# Supplementary material
Source: PubMed Central journal article supplement (PMC6906780)
Supplement: ao9b02851_si_001.pdf [file ao9b02851_si_001.pdf]

*Supplementary Information for:*

**Predicting Stability Constants for Terbium(III) Complexes  
with Dipicolinic Acid and 4-Substituted Dipicolinic Acid  
Analogues Using Density Functional Theory**

Hsieh Chen\*, Rena Shi, and Hooisweng Ow

Aramco Services Company: Aramco Research Center-Boston, 400 Technology Square, Cambridge,  
Massachusetts 02139, United States

\*hsieh.chen@aramcoservices.com

**Table S1. Energy terms from DFT calculations used to construct Table S3.**

| Complex                                                | Functional/<br>Basis Sets <sup>a</sup> | Total DFT<br>Energy (a.u.) | Thermal<br>Correction to<br>Enthalpy<br>(kcal/mol) | Total<br>Entropy<br>(cal/mol/K) | $G^\circ_g$<br>(kcal/mol) | $\Delta G^*_{\text{solv}}$<br>(COSMO)<br>(kcal/mol) | $\Delta G^*_{\text{solv}}$<br>(SMD)<br>(kcal/mol) |
|--------------------------------------------------------|----------------------------------------|----------------------------|----------------------------------------------------|---------------------------------|---------------------------|-----------------------------------------------------|---------------------------------------------------|
| [Tb(H <sub>2</sub> O) <sub>8</sub> ] <sup>3+</sup>     | B3LYP/<br>6-31+G*                      | -1433.814                  | 143.692                                            | 140.019                         | -899616.4                 | -386.19                                             | -394.55                                           |
|                                                        | B3LYP/<br>6-311++G**                   | -1434.096                  | 144.854                                            | 140.16                          | -899792.3                 | -386.2                                              | -394                                              |
|                                                        | M06/<br>6-31+G*                        | -1433.478                  | 140.988                                            | 144.628                         | -899409.6                 | -386.75                                             | -395.12                                           |
|                                                        | M06/<br>6-311++G**                     | -1433.722                  | 142.177                                            | 144.005                         | -899561.5                 | -387.02                                             | -394.76                                           |
| DPA <sup>2-</sup>                                      | B3LYP/<br>6-31+G*                      | -624.2566                  | 63.799                                             | 101.979                         | -391687.6                 | -196.41                                             | -202.28                                           |
|                                                        | B3LYP/<br>6-311++G**                   | -624.4209                  | 63.494                                             | 101.988                         | -391791                   | -196.15                                             | -201.95                                           |
|                                                        | M06/<br>6-31+G*                        | -623.9022                  | 64.187                                             | 100.635                         | -391464.5                 | -197.64                                             | -203.92                                           |
|                                                        | M06/<br>6-311++G**                     | -624.051                   | 63.881                                             | 100.742                         | -391558.2                 | -196.85                                             | -202.93                                           |
| [Tb(DPA)(H <sub>2</sub> O) <sub>8</sub> ] <sup>+</sup> | B3LYP/<br>6-31+G*                      | -2059.083                  | 210.833                                            | 179.39                          | -1291917                  | -71.05                                              | -75                                               |
|                                                        | B3LYP/<br>6-311++G**                   | -2059.527                  | 210.877                                            | 181.394                         | -1292196                  | -69.72                                              | -72.56                                            |
|                                                        | M06/<br>6-31+G*                        | -2058.326                  | 209.078                                            | 186.961                         | -1291446                  | -72.99                                              | -76.98                                            |
|                                                        | M06/<br>6-311++G**                     | -2058.718                  | 209.296                                            | 187.509                         | -1291692                  | -71.16                                              | -74.05                                            |

<sup>a</sup>Non Tb basis sets.

**Table S2. Energy terms from DFT calculations used to construct Table S3.**

| Complex                                                                               | Functional/<br>Basis Sets <sup>a</sup> | Total DFT<br>Energy<br>(a.u.) | Thermal<br>Correction<br>to Enthalpy<br>(kcal/mol) | Total<br>Entropy<br>(cal/mol/K) | G <sup>o</sup> <sub>g</sub><br>(kcal/mol) | ΔG <sup>*solv</sup><br>(COSMO)<br>(kcal/mol) | ΔG <sup>*solv</sup><br>(SMD)<br>(kcal/mol) |
|---------------------------------------------------------------------------------------|----------------------------------------|-------------------------------|----------------------------------------------------|---------------------------------|-------------------------------------------|----------------------------------------------|--------------------------------------------|
| XDPA <sup>2-</sup><br>(-X = -F)                                                       | B3LYP                                  | -723.7013                     | 58.87                                              | 106.74                          | -454095.5                                 | -189.23                                      | -193.64                                    |
|                                                                                       | M06                                    | -723.3042                     | 59.387                                             | 105.328                         | -453845.4                                 | -190.18                                      | -194.9                                     |
| XDPA <sup>2-</sup><br>(-X = -Cl)                                                      | B3LYP                                  | -1084.058                     | 58.224                                             | 109.728                         | -680221                                   | -186.79                                      | -190.58                                    |
|                                                                                       | M06                                    | -1083.659                     | 58.642                                             | 106.923                         | -679969.5                                 | -187.8                                       | -191.95                                    |
| XDPA <sup>2-</sup><br>(-X = -Br)                                                      | B3LYP                                  | -3197.979                     | 57.991                                             | 112.767                         | -2006707                                  | -186.06                                      | -189.2                                     |
|                                                                                       | M06                                    | -3197.485                     | 58.445                                             | 111.242                         | -2006396                                  | -187.6                                       | -191.17                                    |
| XDPA <sup>2-</sup><br>(-X = -I)                                                       | B3LYP                                  | -7543.361                     | 57.825                                             | 115.062                         | -4733435                                  | -184.79                                      | -192.19                                    |
|                                                                                       | M06                                    | -7542.736                     | 58.29                                              | 113.32                          | -4733043                                  | -186.76                                      | -194.68                                    |
| XDPA <sup>2-</sup><br>(-X = -OH)                                                      | B3LYP                                  | -699.6742                     | 66.888                                             | 108.177                         | -439010.9                                 | -197.64                                      | -204.48                                    |
|                                                                                       | M06                                    | -699.2754                     | 67.502                                             | 106.464                         | -438759.6                                 | -198.76                                      | -205.76                                    |
| XDPA <sup>2-</sup><br>(-X = -NH <sub>2</sub> )                                        | B3LYP                                  | -679.7979                     | 74.938                                             | 108.642                         | -426530.6                                 | -202.36                                      | -207.8                                     |
|                                                                                       | M06                                    | -679.3957                     | 75.375                                             | 107.255                         | -426277.4                                 | -203.13                                      | -208.89                                    |
| XDPA <sup>2-</sup><br>(-X = -CH <sub>2</sub> OH)                                      | B3LYP                                  | -738.9945                     | 85.646                                             | 119.982                         | -463669.2                                 | -193.4                                       | -200.09                                    |
|                                                                                       | M06                                    | -738.5613                     | 86.133                                             | 116.699                         | -463395.9                                 | -193.61                                      | -200.81                                    |
| XDPA <sup>2-</sup><br>(-X = -imidazole)                                               | B3LYP                                  | -849.5184                     | 97.994                                             | 123.054                         | -533011.5                                 | -188.01                                      | -193.17                                    |
|                                                                                       | M06                                    | -848.9985                     | 98.306                                             | 121.518                         | -532684.5                                 | -188.22                                      | -193.65                                    |
| [Tb(XDPA)(H <sub>2</sub> O) <sub>8</sub> ] <sup>+</sup><br>(-X = -F)                  | B3LYP                                  | -2158.791                     | 205.947                                            | 185.669                         | -1354491                                  | -71.38                                       | -73.77                                     |
|                                                                                       | M06                                    | -2157.956                     | 204.762                                            | 191.881                         | -1353970                                  | -72.64                                       | -75.06                                     |
| [Tb(XDPA)(H <sub>2</sub> O) <sub>8</sub> ] <sup>+</sup><br>(-X = -Cl)                 | B3LYP                                  | -2519.145                     | 205.416                                            | 191.154                         | -1580615                                  | -70.54                                       | -73.59                                     |
|                                                                                       | M06                                    | -2518.309                     | 203.992                                            | 194.684                         | -1580093                                  | -71.77                                       | -74.79                                     |
| [Tb(XDPA)(H <sub>2</sub> O) <sub>8</sub> ] <sup>+</sup><br>(-X = -Br)                 | B3LYP                                  | -4633.065                     | 205.237                                            | 191.447                         | -2907100                                  | -70.34                                       | -73.99                                     |
|                                                                                       | M06                                    | -4632.135                     | 203.767                                            | 197.522                         | -2906520                                  | -71.63                                       | -75.19                                     |
| [Tb(XDPA)(H <sub>2</sub> O) <sub>8</sub> ] <sup>+</sup><br>(-X = -I)                  | B3LYP                                  | -8978.445                     | 205.111                                            | 193.427                         | -5633827                                  | -70.21                                       | -73.74                                     |
|                                                                                       | M06                                    | -8977.385                     | 203.617                                            | 199.623                         | -5633165                                  | -71.48                                       | -75.21                                     |
| [Tb(XDPA)(H <sub>2</sub> O) <sub>8</sub> ] <sup>+</sup><br>(-X = -OH)                 | B3LYP                                  | -2134.779                     | 214.293                                            | 186.28                          | -1339415                                  | -73.31                                       | -76.68                                     |
|                                                                                       | M06                                    | -2133.944                     | 212.936                                            | 192.551                         | -1338895                                  | -74.71                                       | -78.17                                     |
| [Tb(XDPA)(H <sub>2</sub> O) <sub>8</sub> ] <sup>+</sup><br>(-X = -NH <sub>2</sub> )   | B3LYP                                  | -2114.917                     | 222.181                                            | 188.401                         | -1326945                                  | -71.16                                       | -74.2                                      |
|                                                                                       | M06                                    | -2114.078                     | 220.716                                            | 194.361                         | -1326421                                  | -72.46                                       | -75.61                                     |
| [Tb(XDPA)(H <sub>2</sub> O) <sub>8</sub> ] <sup>+</sup><br>(-X = -CH <sub>2</sub> OH) | B3LYP                                  | -2174.094                     | 232.921                                            | 195.688                         | -1364070                                  | -72.48                                       | -76.06                                     |
|                                                                                       | M06                                    | -2173.223                     | 231.383                                            | 201.986                         | -1363526                                  | -73.83                                       | -77.49                                     |
| [Tb(XDPA)(H <sub>2</sub> O) <sub>8</sub> ] <sup>+</sup><br>(-X = -imidazole)          | B3LYP                                  | -2284.598                     | 245.103                                            | 202.514                         | -1433401                                  | -76.63                                       | -80.3                                      |
|                                                                                       | M06                                    | -2283.64                      | 243.513                                            | 208.401                         | -1432803                                  | -77.62                                       | -81.2                                      |

<sup>a</sup>6-311++G\*\* basis set was used for all atoms except Tb.

**Table S3. Compiled  $\Delta G^\circ_g$ ,  $\Delta G_{aq}$ , and  $\log K_l$  calculated in this work.**

| Equilibrium                                                                         | Functional/<br>Basis Sets <sup>a</sup> | $\Delta G^\circ_g$<br>(kcal/mol) | $\Delta G_{aq}$<br>(COSMO)<br>(kcal/mol) | $\Delta G_{aq}$<br>(SMD)<br>(kcal/mol) | $\log K_l$<br>(COSMO) | $\log K_l$<br>(SMD) |
|-------------------------------------------------------------------------------------|----------------------------------------|----------------------------------|------------------------------------------|----------------------------------------|-----------------------|---------------------|
| $Tb^{3+} + DPA^{2-} \rightleftharpoons [Tb(DPA)]^+$                                 | B3LYP/<br>6-31+G*                      | -613.2968                        | -103.6368                                | -93.35681                              | 75.886653             | 68.359262           |
|                                                                                     | B3LYP/<br>6-311++G**                   | -612.9136                        | -102.1736                                | -91.41359                              | 74.815229             | 66.936364           |
|                                                                                     | M06/<br>6-31+G*                        | -572.0165                        | -62.50649                                | -51.84649                              | 45.769532             | 37.963891           |
|                                                                                     | M06/<br>6-311++G**                     | -572.7467                        | -61.92669                                | -50.99669                              | 45.344979             | 37.341634           |
| $Tb^{3+} + XDPA^{2-} \rightleftharpoons [Tb(XDPA)]^+$<br>(-X = -F)                  | B3LYP/<br>6-311++G**                   | -602.7796                        | -100.6196                                | -90.79962                              | 73.677354             | 66.486792           |
|                                                                                     | M06/<br>6-311++G**                     | -563.3082                        | -60.63821                                | -50.59821                              | 44.401513             | 37.049859           |
| $Tb^{3+} + XDPA^{2-} \rightleftharpoons [Tb(XDPA)]^+$<br>(-X = -Cl)                 | B3LYP/<br>6-311++G**                   | -601.8254                        | -101.2654                                | -92.72542                              | 74.150239             | 67.896939           |
|                                                                                     | M06/<br>6-311++G**                     | -561.9203                        | -60.76032                                | -51.89032                              | 44.490922             | 37.995984           |
| $Tb^{3+} + XDPA^{2-} \rightleftharpoons [Tb(XDPA)]^+$<br>(-X = -Br)                 | B3LYP/<br>6-311++G**                   | -600.3686                        | -100.3386                                | -93.04863                              | 73.471603             | 68.133599           |
|                                                                                     | M06/<br>6-311++G**                     | -562.0628                        | -60.96276                                | -53.21276                              | 44.639156             | 38.964323           |
| $Tb^{3+} + XDPA^{2-} \rightleftharpoons [Tb(XDPA)]^+$<br>(-X = -I)                  | B3LYP/<br>6-311++G**                   | -598.9842                        | -100.0942                                | -88.4242                               | 73.292627             | 64.747427           |
|                                                                                     | M06/<br>6-311++G**                     | -561.1077                        | -60.69772                                | -48.76772                              | 44.445085             | 35.709504           |
| $Tb^{3+} + XDPA^{2-} \rightleftharpoons [Tb(XDPA)]^+$<br>(-X = -OH)                 | B3LYP/<br>6-311++G**                   | -611.9632                        | -103.3232                                | -92.05324                              | 75.657048             | 67.404742           |
|                                                                                     | M06/<br>6-311++G**                     | -573.4662                        | -64.28616                                | -53.00616                              | 47.072669             | 38.813042           |
| $Tb^{3+} + XDPA^{2-} \rightleftharpoons [Tb(XDPA)]^+$<br>(-X = -NH <sub>2</sub> )   | B3LYP/<br>6-311++G**                   | -621.6244                        | -106.1144                                | -95.91439                              | 77.700827             | 70.232015           |
|                                                                                     | M06/<br>6-311++G**                     | -582.5997                        | -66.79972                                | -56.44972                              | 48.913195             | 41.334548           |
| $Tb^{3+} + XDPA^{2-} \rightleftharpoons [Tb(XDPA)]^+$<br>(-X = -CH <sub>2</sub> OH) | B3LYP/<br>6-311++G**                   | -608.1989                        | -102.9689                                | -92.05892                              | 75.397604             | 67.408904           |
|                                                                                     | M06/<br>6-311++G**                     | -568.7147                        | -63.80466                                | -52.52466                              | 46.720099             | 38.460472           |
| $Tb^{3+} + XDPA^{2-} \rightleftharpoons [Tb(XDPA)]^+$<br>(-X = -imidazole)          | B3LYP/<br>6-311++G**                   | -596.7788                        | -101.0888                                | -91.79885                              | 74.020943             | 67.218466           |
|                                                                                     | M06/<br>6-311++G**                     | -556.9563                        | -61.22629                                | -51.63629                              | 44.832125             | 37.809977           |

<sup>a</sup>Non Tb basis sets.

**Table S4. Natural electron configurations of Tb in different complexes from Mulliken analysis.**

| Complex                                                                               | Functional/<br>Basis Sets <sup>a</sup> | 6s   |                   |                 | 4f   |                   |                 | 5d   |                   |                 |
|---------------------------------------------------------------------------------------|----------------------------------------|------|-------------------|-----------------|------|-------------------|-----------------|------|-------------------|-----------------|
|                                                                                       |                                        | gas  | solution<br>COSMO | solution<br>SMD | gas  | solution<br>COSMO | solution<br>SMD | gas  | solution<br>COSMO | solution<br>SMD |
| [Tb(H <sub>2</sub> O) <sub>8</sub> ] <sup>3+</sup>                                    | B3LYP                                  | 0.47 | 0.49              | 0.49            | 8.15 | 8.14              | 8.14            | 0.38 | 0.37              | 0.37            |
| [Tb(DPA)(H <sub>2</sub> O) <sub>8</sub> ] <sup>+</sup>                                |                                        | 0.42 | 0.46              | 0.48            | 8.17 | 8.16              | 8.15            | 0.45 | 0.44              | 0.44            |
| [Tb(XDPA)(H <sub>2</sub> O) <sub>8</sub> ] <sup>+</sup><br>(-X = -F)                  |                                        | 0.43 | 0.47              | 0.49            | 8.17 | 8.15              | 8.15            | 0.45 | 0.44              | 0.43            |
| [Tb(XDPA)(H <sub>2</sub> O) <sub>8</sub> ] <sup>+</sup><br>(-X = -Cl)                 |                                        | 0.43 | 0.47              | 0.50            | 8.17 | 8.16              | 8.15            | 0.44 | 0.44              | 0.43            |
| [Tb(XDPA)(H <sub>2</sub> O) <sub>8</sub> ] <sup>+</sup><br>(-X = -Br)                 |                                        | 0.42 | 0.47              | 0.49            | 8.17 | 8.16              | 8.15            | 0.44 | 0.44              | 0.43            |
| [Tb(XDPA)(H <sub>2</sub> O) <sub>8</sub> ] <sup>+</sup><br>(-X = -I)                  |                                        | 0.42 | 0.47              | 0.49            | 8.17 | 8.16              | 8.15            | 0.45 | 0.44              | 0.43            |
| [Tb(XDPA)(H <sub>2</sub> O) <sub>8</sub> ] <sup>+</sup><br>(-X = -OH)                 |                                        | 0.42 | 0.46              | 0.48            | 8.17 | 8.16              | 8.15            | 0.45 | 0.44              | 0.44            |
| [Tb(XDPA)(H <sub>2</sub> O) <sub>8</sub> ] <sup>+</sup><br>(-X = -NH <sub>2</sub> )   |                                        | 0.42 | 0.46              | 0.48            | 8.17 | 8.16              | 8.16            | 0.45 | 0.44              | 0.44            |
| [Tb(XDPA)(H <sub>2</sub> O) <sub>8</sub> ] <sup>+</sup><br>(-X = -CH <sub>2</sub> OH) |                                        | 0.43 | 0.47              | 0.49            | 8.17 | 8.16              | 8.15            | 0.45 | 0.44              | 0.44            |
| [Tb(XDPA)(H <sub>2</sub> O) <sub>8</sub> ] <sup>+</sup><br>(-X = -imidazole)          |                                        | 0.44 | 0.48              | 0.50            | 8.17 | 8.16              | 8.16            | 0.44 | 0.44              | 0.43            |
| [Tb(H <sub>2</sub> O) <sub>8</sub> ] <sup>3+</sup>                                    | M06                                    | 0.47 | 0.49              | 0.49            | 8.14 | 8.14              | 8.13            | 0.37 | 0.36              | 0.36            |
| [Tb(DPA)(H <sub>2</sub> O) <sub>8</sub> ] <sup>+</sup>                                |                                        | 0.41 | 0.46              | 0.47            | 8.18 | 8.17              | 8.17            | 0.43 | 0.42              | 0.42            |
| [Tb(XDPA)(H <sub>2</sub> O) <sub>8</sub> ] <sup>+</sup><br>(-X = -F)                  |                                        | 0.41 | 0.46              | 0.48            | 8.18 | 8.17              | 8.17            | 0.42 | 0.42              | 0.42            |
| [Tb(XDPA)(H <sub>2</sub> O) <sub>8</sub> ] <sup>+</sup><br>(-X = -Cl)                 |                                        | 0.42 | 0.46              | 0.48            | 8.18 | 8.17              | 8.17            | 0.42 | 0.42              | 0.42            |
| [Tb(XDPA)(H <sub>2</sub> O) <sub>8</sub> ] <sup>+</sup><br>(-X = -Br)                 |                                        | 0.41 | 0.46              | 0.48            | 8.18 | 8.17              | 8.16            | 0.43 | 0.42              | 0.42            |
| [Tb(XDPA)(H <sub>2</sub> O) <sub>8</sub> ] <sup>+</sup><br>(-X = -I)                  |                                        | 0.41 | 0.46              | 0.48            | 8.18 | 8.17              | 8.17            | 0.43 | 0.42              | 0.42            |
| [Tb(XDPA)(H <sub>2</sub> O) <sub>8</sub> ] <sup>+</sup><br>(-X = -OH)                 |                                        | 0.41 | 0.46              | 0.48            | 8.18 | 8.17              | 8.17            | 0.43 | 0.42              | 0.42            |
| [Tb(XDPA)(H <sub>2</sub> O) <sub>8</sub> ] <sup>+</sup><br>(-X = -NH <sub>2</sub> )   |                                        | 0.42 | 0.46              | 0.48            | 8.18 | 8.17              | 8.17            | 0.43 | 0.42              | 0.42            |
| [Tb(XDPA)(H <sub>2</sub> O) <sub>8</sub> ] <sup>+</sup><br>(-X = -CH <sub>2</sub> OH) |                                        | 0.42 | 0.46              | 0.48            | 8.18 | 8.17              | 8.16            | 0.43 | 0.42              | 0.42            |
| [Tb(XDPA)(H <sub>2</sub> O) <sub>8</sub> ] <sup>+</sup><br>(-X = -imidazole)          |                                        | 0.42 | 0.47              | 0.49            | 8.18 | 8.17              | 8.17            | 0.42 | 0.42              | 0.42            |

<sup>a</sup>6-311++G\*\* basis set was used for all atoms except Tb.

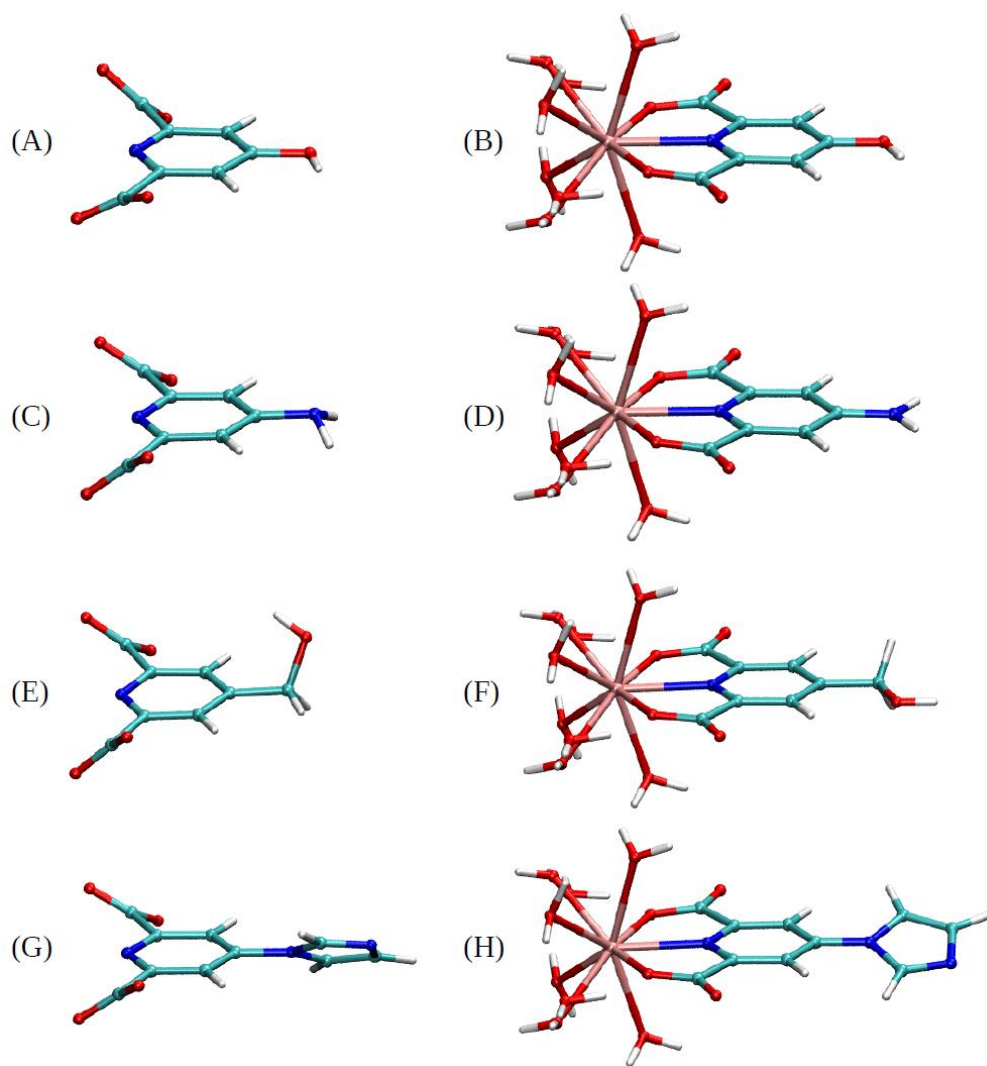

**Figure S1.** Equilibrium geometries of the  $\text{XDPA}^{2-}$  (A, C, E, and G) and  $[\text{Tb}(\text{XDPA})(\text{H}_2\text{O})_8]^+$  (B, D, F, and H) complexes with X = -OH (A and B), - $\text{NH}_2$  (C and D), - $\text{CH}_2\text{OH}$  (E and F), and -imidazole (G and H). (Note the geometries for the X = halide substitutes were similar to Figure 1 and were not duplicated here.)

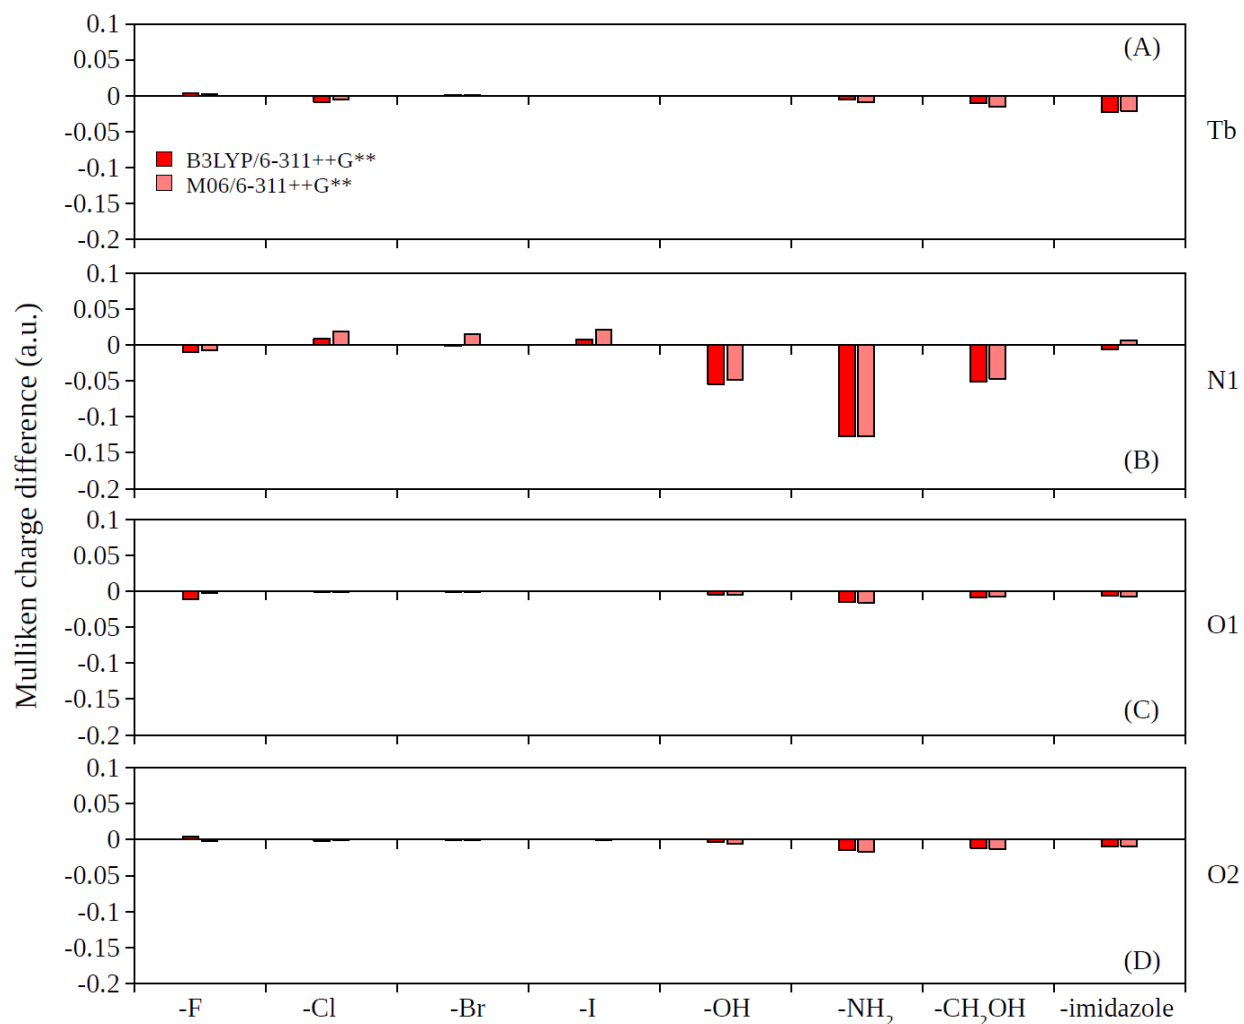

**Figure S2.** Partial charge differences predicted by Mulliken population analysis in gas phase for (A) Tb, (B) N1, (C) O1, and (D) O2 atoms in  $[\text{Tb}(\text{XDPA})(\text{H}_2\text{O})_8]^+$  complexes compared to in  $[\text{Tb}(\text{DPA})(\text{H}_2\text{O})_8]^+$  complex.

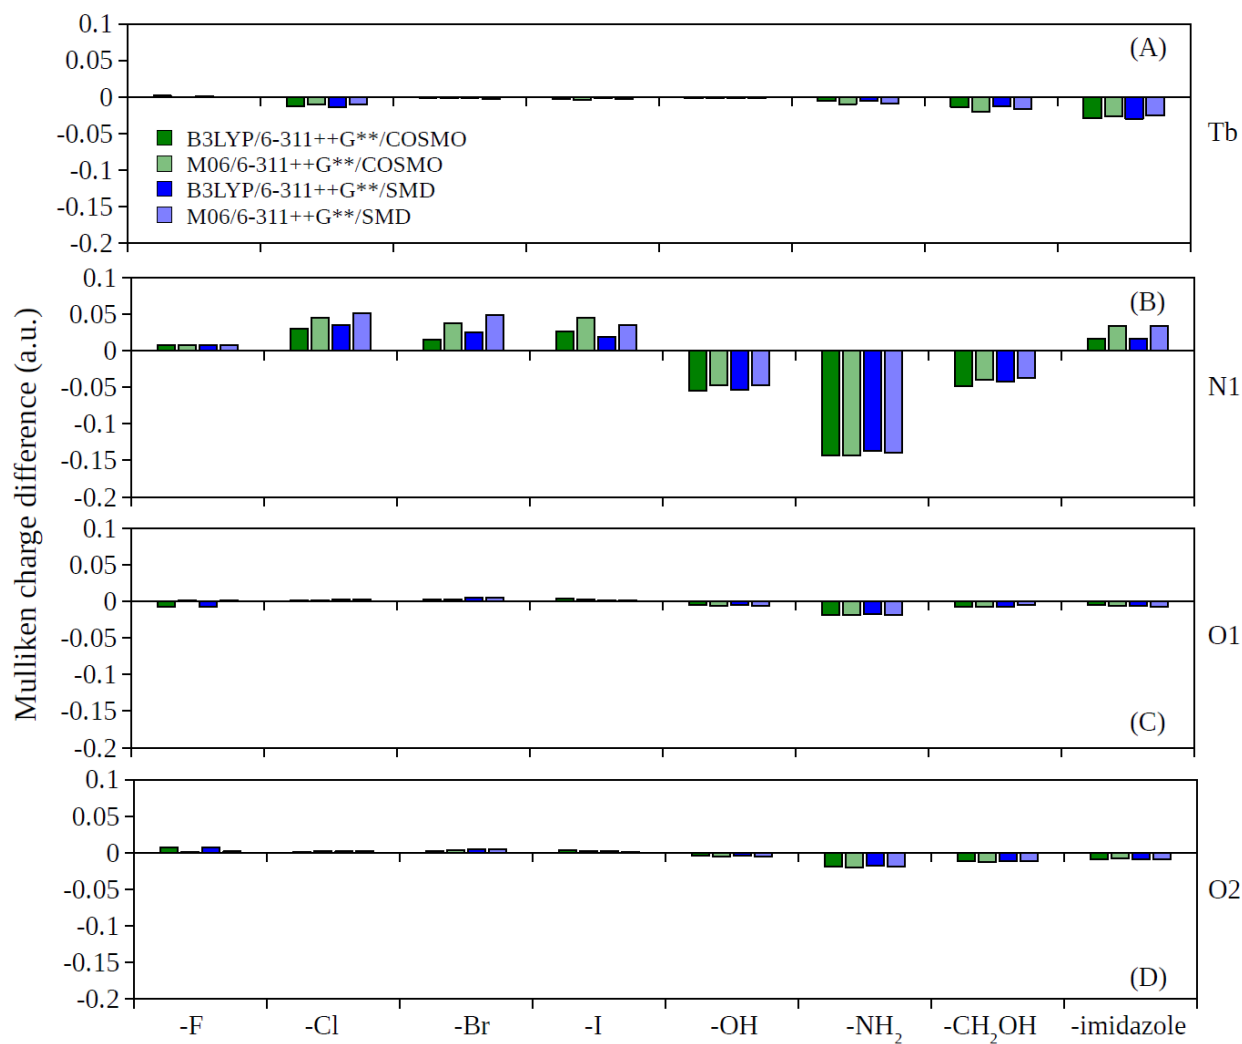

**Figure S3.** Partial charge differences predicted by Mulliken population analysis in solution phase for (A)

Tb, (B) N1, (C) O1, and (D) O2 atoms in [Tb(XDPA)(H<sub>2</sub>O)<sub>8</sub>]<sup>+</sup> complexes compared to in

[Tb(DPA)(H<sub>2</sub>O)<sub>8</sub>]<sup>+</sup> complex.



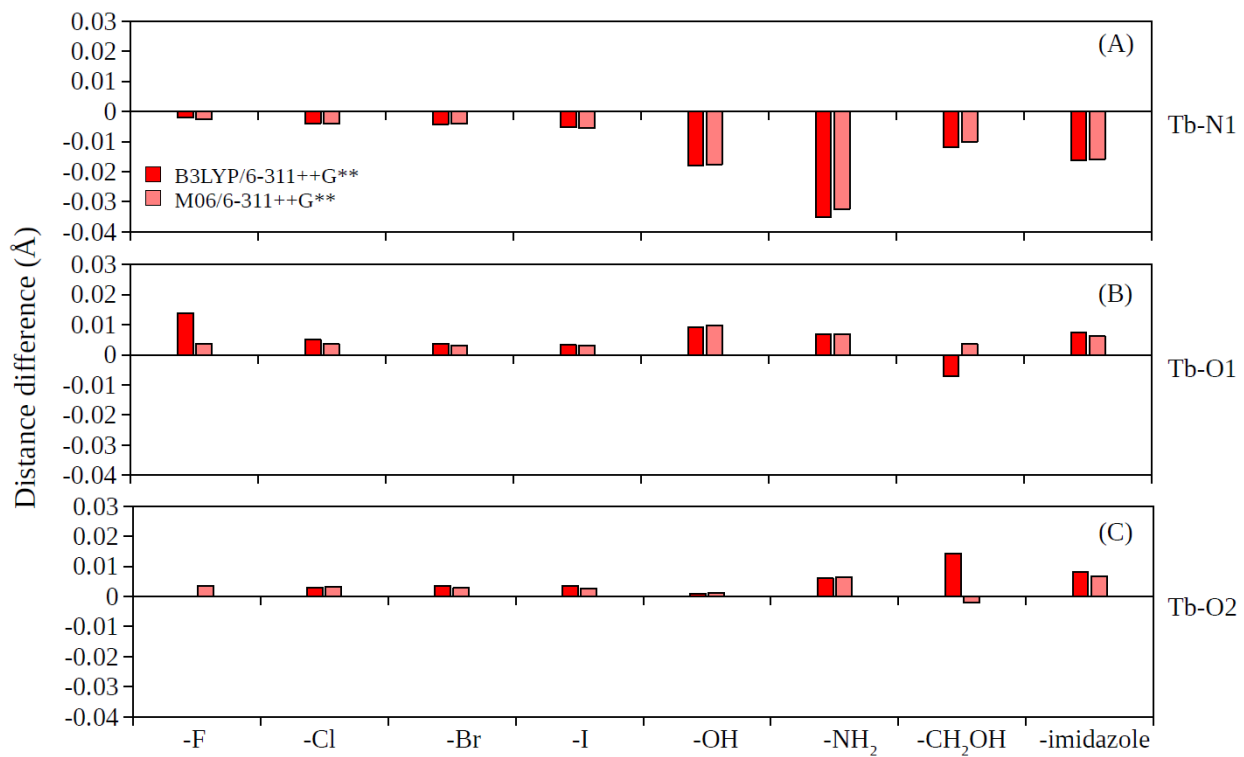

**Figure S4.** Interatomic distance differences in  $[\text{Tb}(\text{XDPA})(\text{H}_2\text{O})_8]^+$  complexes compared to in  $[\text{Tb}(\text{DPA})(\text{H}_2\text{O})_8]^+$  complex for (A) Tb-N1, (B) Tb-O1, and (C) Tb-O2 pairs.
